# Supplementary material for: Efficacy evaluation of thickened condom in the treatment of premature ejaculation
Source: PubMed Central journal article supplement — Transl Androl Urol. 2022 Feb;11(2):253–9. doi: 10.21037/tau-22-8 (PMC8899143; doi:10.21037/tau-22-8), 2022-02
Supplement: tau-11-02-253-dss.pdf [file tau-11-02-253-dss.pdf]

## Data Sharing Statement

|                     |                                                                                                                                                     |                                                            |
|---------------------|-----------------------------------------------------------------------------------------------------------------------------------------------------|------------------------------------------------------------|
| <b>Article Info</b> | <a href="https://dx.doi.org/10.21037/tau-22-8">https://dx.doi.org/10.21037/tau-22-8</a>                                                             |                                                            |
| <b>Item</b>         | <b>Question</b>                                                                                                                                     | <b>Authors' Response<br/>(place "-" if not applicable)</b> |
| 1                   | Would you like to share data collected for your study to others?                                                                                    | Yes                                                        |
| 2                   | If not, would you like to share the reason for your decision?                                                                                       | -                                                          |
| 3                   | What data in particular will be shared?                                                                                                             | Basic information of the patient                           |
| 4                   | Any other documents will be shared? Such as study protocol, statistical analysis plan, informed consent form, clinical study report, analytic code. | NO!                                                        |
| 5                   | When will data availability begin?                                                                                                                  | Since the publication                                      |
| 6                   | When will data availability end?                                                                                                                    | Within a year                                              |
| 7                   | To whom will you share the data?                                                                                                                    | Colleagues or researchers                                  |
| 8                   | For what type of analysis or purpose?                                                                                                               | Just for research                                          |
| 9                   | How or where can the data/documents be obtained?                                                                                                    | Correspondence author<br>ycx917@126.com                    |
| 10                  | Any other restrictions?                                                                                                                             | -                                                          |
